# Supplementary material for: Photo-induced electron transfer in a diamino-substituted Ru(bpy)3[PF6]2 complex and its application as a triplet photosensitizer for nitric oxide (NO)-activated triplet—triplet annihilation upconversion
Source: Royal Society of Chemistry journal article supplement (doi:10.1039/c6pp00153j), 2016-06-22
Supplement: c6pp00153j1.pdf [file c6pp00153j1.pdf]

Electronic Supplementary Information for:

# Photo-induced Electron Transfer in a Diamino- substituted Ru(bpy)<sub>3</sub>[PF<sub>6</sub>]<sub>2</sub> Complex and Its Application as Triplet Photosensitizer for Nitric Oxide (NO)- Activated Triplet-Triplet Annihilation Upconversion

Kejing Xu,<sup>a</sup> Jianzhang Zhao\*<sup>a</sup> and Evan G. Moore\*<sup>b</sup>

<sup>a</sup> State Key Laboratory of Fine Chemicals, School of Chemical Engineering, Dalian University of  
Technology, Dalian 116024 (China)

E-mail: zhaojzh@dlut.edu.cn      Web: <http://finechem2.dlut.edu.cn/photochem>

<sup>b</sup> School of Chemistry and Molecular Biosciences, University of Queensland, St Lucia Campus, Brisbane,  
QLD, 4072, Australia. Phone: Int. +61 7 3365 3862 Fax: Int. +61 7 3365 4273 Email:

[egmoore@uq.edu.au](mailto:egmoore@uq.edu.au)

## Index

|                                                                                                          |    |
|----------------------------------------------------------------------------------------------------------|----|
| 1.0 Synthesis scheme of <b>Ru-1</b> and <b>Ru-2</b> .....                                                | 3  |
| 2.0 NMR and HR-MS spectra.....                                                                           | 5  |
| 3.0 Changes of phosphorescence of <b>Ru-1</b> upon the addition of NO.....                               | 11 |
| 4.0 Phosphorescence emission spectra of <b>Ru-1</b> and <b>Ru-2</b> in different deaerated solvents..... | 11 |
| 5.0 Emission spectra and the decay trace of <b>Ru-1</b> and <b>Ru-2</b> at 77 K.....                     | 12 |

|                                                                                                                                     |    |
|-------------------------------------------------------------------------------------------------------------------------------------|----|
| 6.0 Transient absorption spectra of <b>Ru-1</b> with a high concentration.....                                                      | 12 |
| 7.0 Nanosecond transient absorption spectra of <b>Ru-1</b> , <b>Ru-2</b> and Ru(bpy) <sub>3</sub> .....                             | 13 |
| 8.0 Femtosecond Transient absorption spectra of <b>Ru-2</b> and Ru(bpy) <sub>3</sub> .....                                          | 14 |
| 9.0 Changes of emission intensity of DPA upon the addition of NO.....                                                               | 16 |
| 10.0 Changes of emission intensity of <b>Ru-1</b> and <b>Ru-2</b> upon the addition of NO.....                                      | 16 |
| 11.0 HPLC analysis of the complexes <b>Ru-1</b> , <b>Ru-2</b> and the reaction mixture of <b>Ru-1</b> + NO.....                     | 17 |
| 12.0 The TTA upconversion of <b>Ru-1</b> and <b>Ru-2</b> upon the addition of NO.....                                               | 17 |
| 13.0 The changes of phosphorescence upon addition of DPA.....                                                                       | 18 |
| 14.0 Decay curves of <b>Ru-1</b> in aerated CH <sub>3</sub> CN.....                                                                 | 19 |
| 15.0 The calculation of triplet quantum yield.....                                                                                  | 20 |
| 16.0 Cyclic voltammogram of <b>Ru-1</b> , <b>Ru-2</b> and Ru(bpy) <sub>3</sub> Cl <sub>2</sub> in deaerated CH <sub>3</sub> CN..... | 20 |
| 17.0 Simplified Jablonski Diagram Illustrating the Photophysical Processes.....                                                     | 21 |

## 1.0 Synthesis of Ru-1 and Ru-2

### Scheme S1. Synthesis of Ru-1 and Ru-2<sup>a</sup>

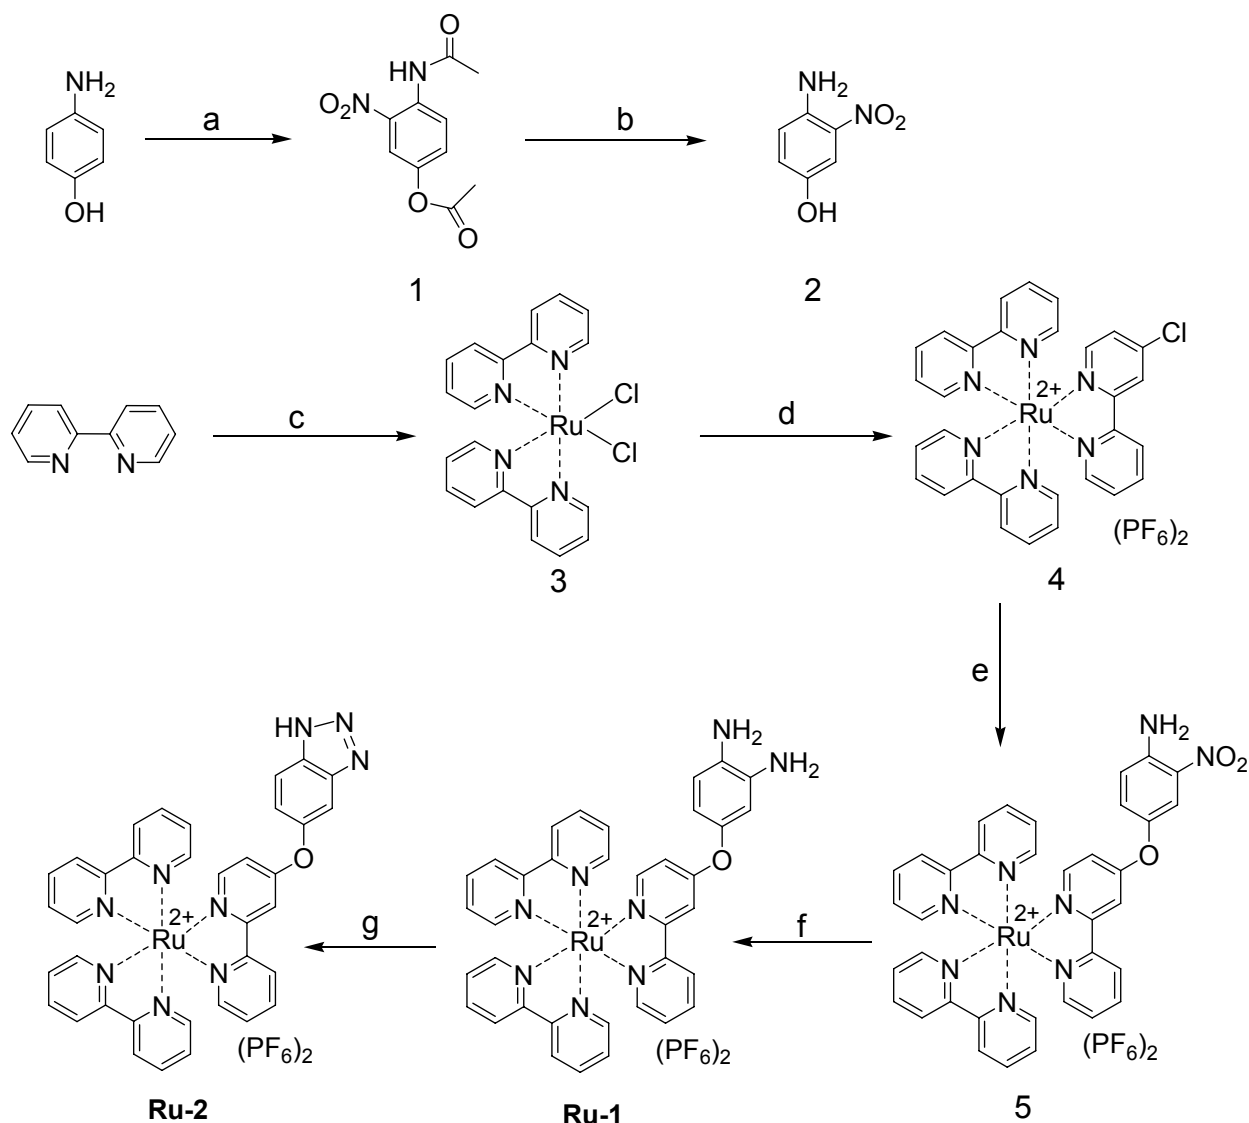

<sup>a</sup> Key: (a) acetic anhydride, Fuming nitric acid, 1.5 h. Yield: 81%; (b) NaOH, ethanol, 60 °C, 1 h. Yield: 49%; (c) LiCl, DMF, 160 °C, 8 h. Yield: 42%; (d) methanol, reflux, 8 h. Yield: 83%; (e) NaH, dry CH<sub>3</sub>CN, r.t. Yield: 95%; (f) hydrazine hydrate, Pd/C, ethanol, reflux, 2 h. Yield: 96%; (g) NaNO<sub>2</sub>, 2 M HCl, 0 °C, 2 h. Yield: 69%.

#### Synthesis of Compound 2

**2:** The compound 1 and compound 2 was synthesized according to the literature report.<sup>1</sup> Compound 2: (Yield: 49.0 %). mp 149.2– 150.4 °C. <sup>1</sup>H NMR (400 MHz, CDCl<sub>3</sub>): δ 7.57 (d, 1H, *J* = 4.0 Hz), 7.04 (m, 1H), 6.76 (d, 1H, *J* = 12.0 Hz), 5.81 (s, 2H), 4.98 (s, 1H). MALDI-HRMS: calcd ([C<sub>6</sub>H<sub>6</sub>N<sub>2</sub>O<sub>3</sub>]<sup>+</sup>), *m/z* = 154.0378, found *m/z* = 154.0379.

### Synthesis of Compound 2

**3:**<sup>2</sup> Yield: 41.6%. <sup>1</sup>H NMR (400 MHz, DMSO-d<sub>6</sub>):  $\delta$  (ppm) 9.98 (d, 2H,  $J = 5.0$  Hz), 8.64 (d, 2H,  $J = 10.0$  Hz), 8.49 (d, 2H,  $J = 10.0$  Hz), 8.07–8.04 (m, 2H), 7.76 (t, 2H,  $J = 5.0$  Hz), 7.69–7.65 (m, 2H), 7.51 (d, 2H,  $J = 5.0$  Hz), 7.11–7.09 (m, 2H). ESI-MS ( $m/z$ ): calcd ([C<sub>20</sub>H<sub>16</sub>N<sub>4</sub>Cl<sub>2</sub>Ru + Na]<sup>+</sup>),  $m/z = 506.9693$ , found  $m/z = 506.9702$ .

### Synthesis of Compound 4

**4:**<sup>3</sup> Yield: 83%. <sup>1</sup>H NMR (400 MHz, CD<sub>3</sub>CN):  $\delta$  8.58 (d, 1H,  $J = 4.0$  Hz), 8.51–8.48 (m, 5H), 8.09–8.03 (m, 5H), 7.78–7.70 (m, 5H), 7.65 (d, 1H,  $J = 4.0$  Hz), 7.44–7.39 (m, 6H); ESI-MS ( $m/z$ ): calcd ([M – 2PF<sub>6</sub>]<sup>2+</sup>),  $m/z = 302.0358$ , found  $m/z = 302.0365$ .

### Synthesis of Compound 5

**5:**<sup>3</sup> Yield: 95%. <sup>1</sup>H NMR (400 MHz, CD<sub>3</sub>CN):  $\delta$  8.51–8.47 (m, 4H), 8.41 (d, 1H,  $J = 12.0$  Hz), 8.09–7.97 (m, 6H), 7.90 (d, 1H,  $J = 4.0$  Hz), 7.83 (d, 1H,  $J = 4.0$  Hz), 7.76–7.71 (m, 4H), 7.50–7.35 (m, 6H), 7.28–7.25 (m, 1H), 7.11 (d, 1H,  $J = 8.0$  Hz), 6.93–6.91 (m, 1H), 6.65 (s, 2H); ESI-MS ( $m/z$ ): calcd ([M – 2PF<sub>6</sub>]<sup>2+</sup>),  $m/z = 361.0664$ , found  $m/z = 361.0657$ .

### Synthesis of Ru-1

**Ru-1:**<sup>3</sup> Yield: 95.7%. <sup>1</sup>H NMR (400 MHz, CD<sub>3</sub>CN):  $\delta$  8.50–8.46 (m, 4H), 8.37 (d, 1H,  $J = 8.0$  Hz), 8.08–7.99 (m, 6H), 7.83 (d, 1H,  $J = 4.0$  Hz), 7.76–7.70 (m, 4H), 7.43–7.35 (m, 6H), 6.82–6.80 (m, 1H), 6.69 (d, 1H,  $J = 8.0$  Hz), 6.43 (d, 1H,  $J = 4.0$  Hz), 6.34–6.32 (m, 1H), 3.92 (br, 4H); ESI-MS ( $m/z$ ): calcd ([M – PF<sub>6</sub>]<sup>+</sup>),  $m/z = 837.1228$ , found  $m/z = 837.1242$ .

### Synthesis of Ru-2

**Ru-2:**<sup>3</sup> Yield: 69.0%. <sup>1</sup>H NMR (400 MHz, CD<sub>3</sub>CN):  $\delta$  8.53–8.49 (m, 4H), 8.38 (d, 1H,  $J = 8.0$  Hz), 8.10–7.99 (m, 7H), 7.87 (d, 1H,  $J = 4.0$  Hz), 7.78–7.73 (m, 5H), 7.54 (d, 1H,  $J = 8.0$  Hz), 7.48–7.37 (m, 5H), 7.32–7.29 (m, 1H), 6.67–6.94 (m, 1H); ESI-MS ( $m/z$ ): calcd ([M – 2PF<sub>6</sub>]<sup>2+</sup>),  $m/z = 351.5691$ , found  $m/z = 351.5679$ .

1 H. Yu, Y. Yan, Y. Cai and Y. Gu, *Fine Chemical Intermediates*, 2008, **38**, 40–42.

2 K. Adamson, C. Dolan, N. Moran, R. J. Forster and T. E. Keyes, *Bioconjug. Chem.*, 2014, **25**, 928–944.

3 R. Zhang, Z. Ye, G. Wang, W. Zhang and J. Yuan, *Chem. Eur. J.*, **2010**, *16*, 6884–6891.

## 2.0 NMR and HR-MS spectra

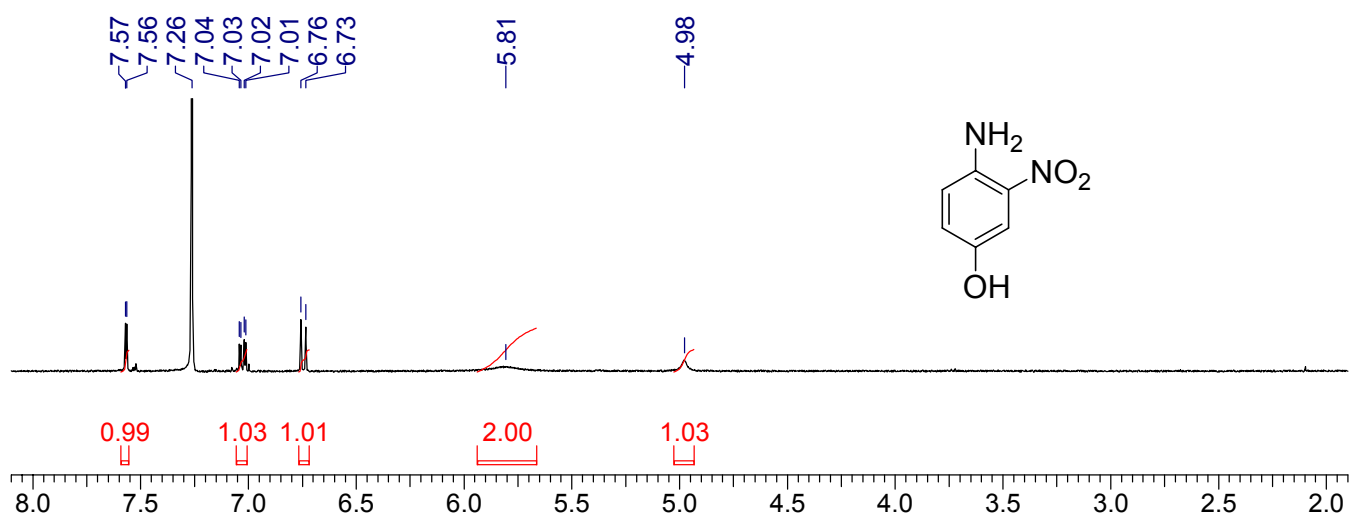

**Fig. S1** <sup>1</sup>H NMR of compound **2** (400 MHz, CDCl<sub>3</sub>).

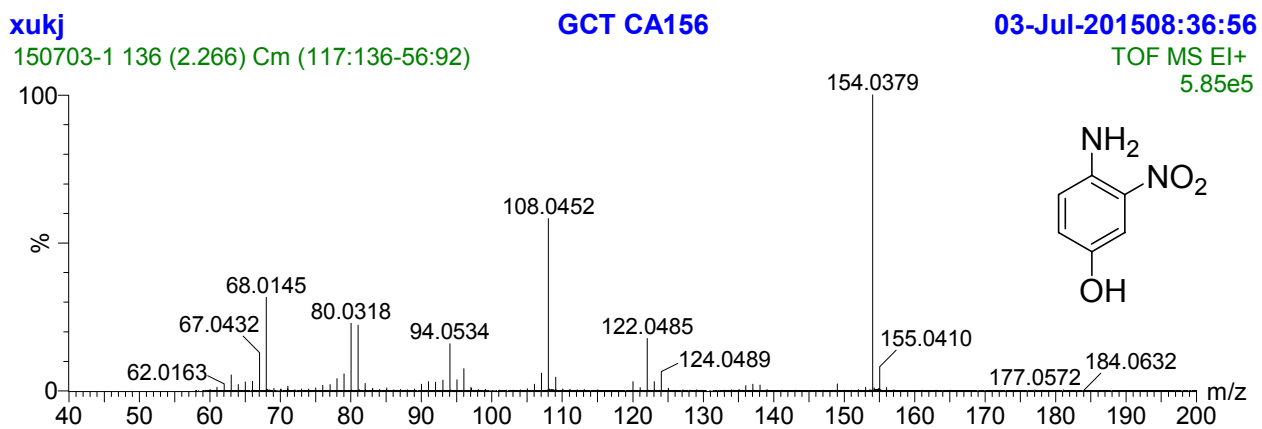

**Fig. S2** TOF EI MS of compound **2**.

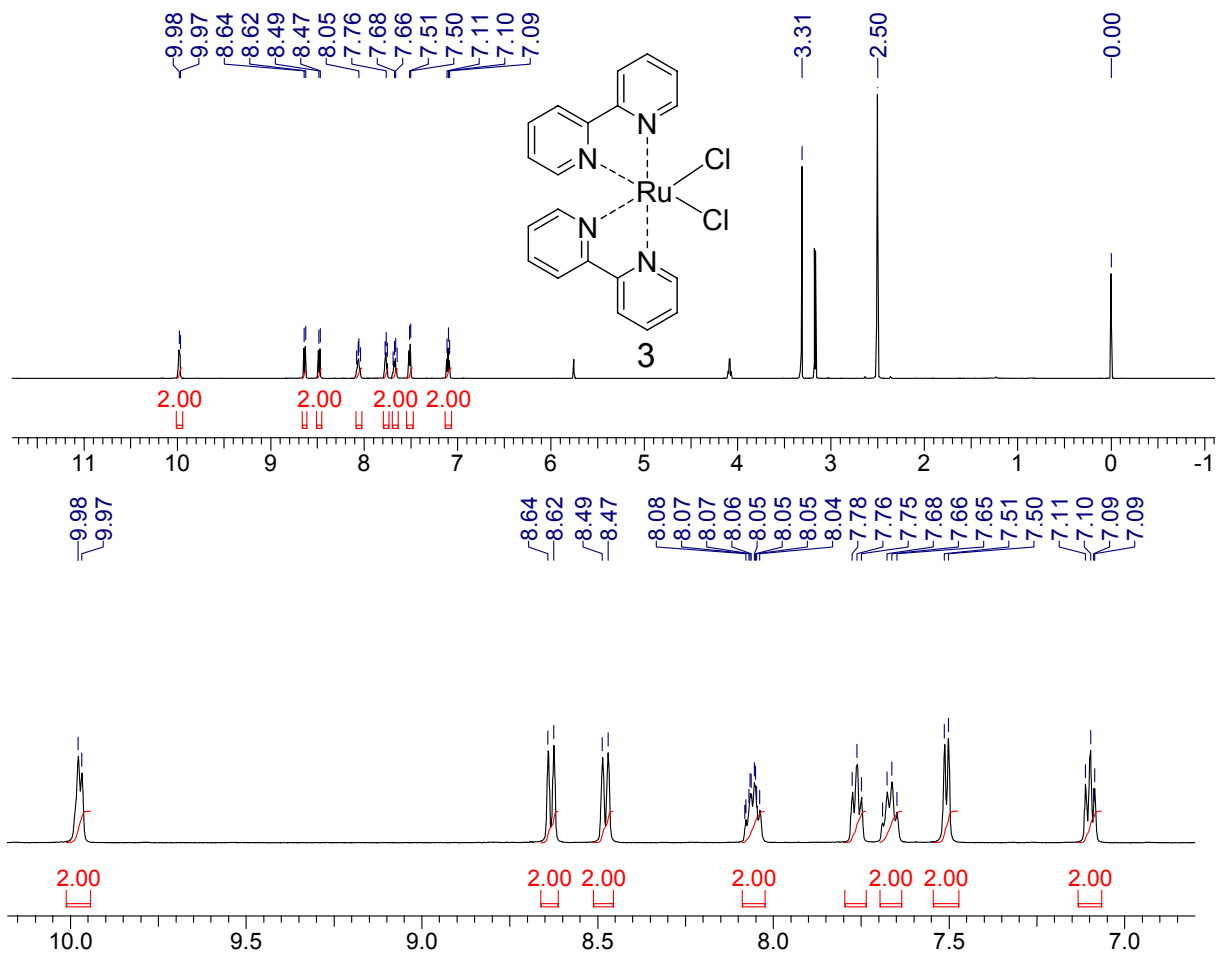

**Fig. S3**  $^1\text{H}$  NMR of compound **3** (400 MHz,  $\text{DMSO-d}_6$ ).

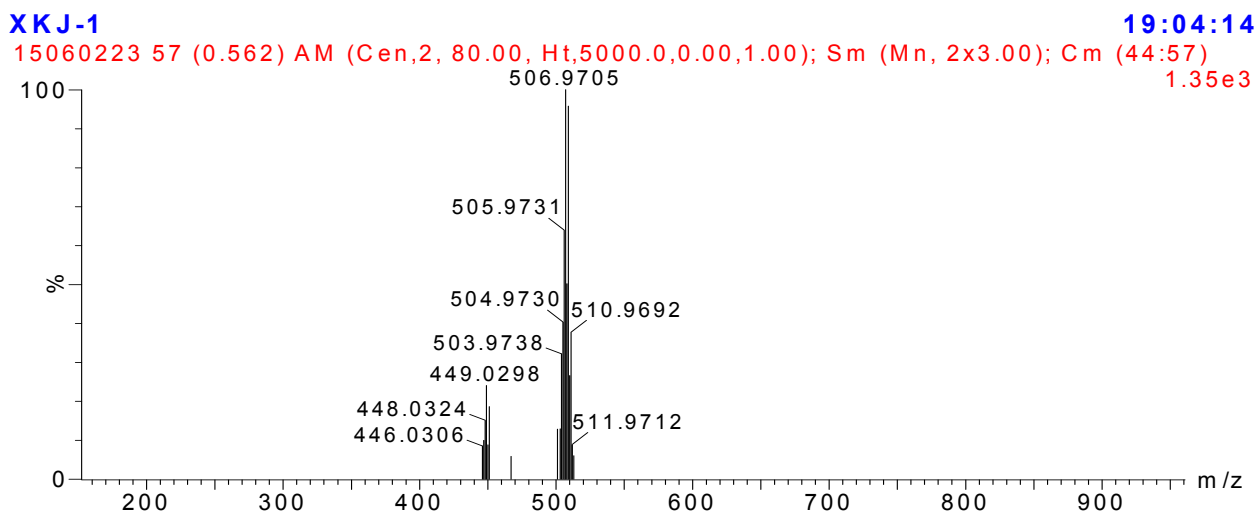

**Fig. S4** MALDI-HRMS of compound **3**.

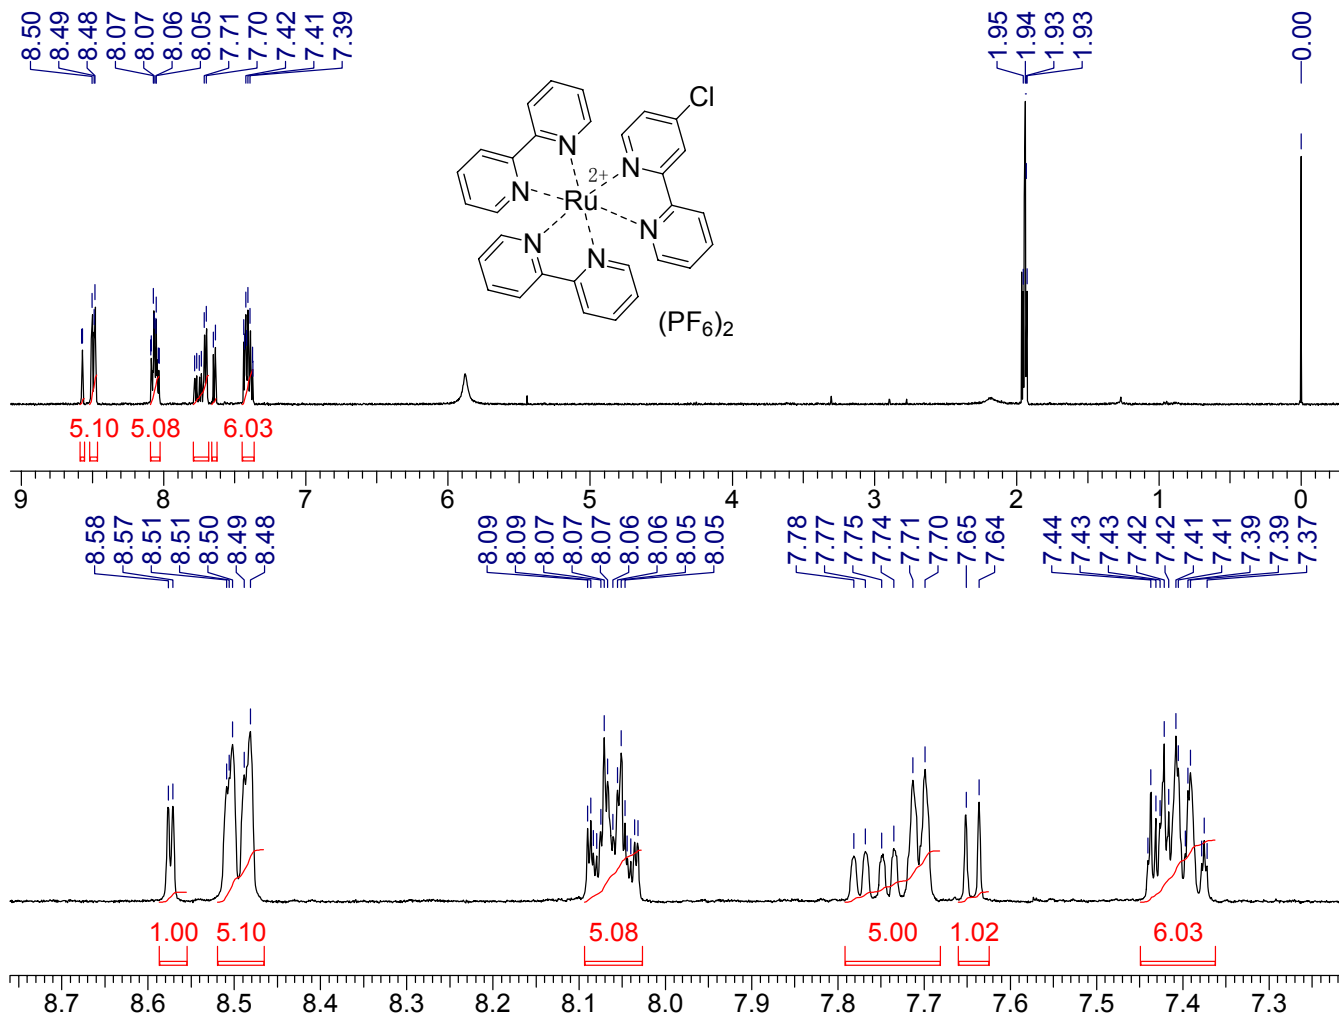

**Fig. S5** <sup>1</sup>H NMR of compound **4** (400 MHz, CD<sub>3</sub>CN).

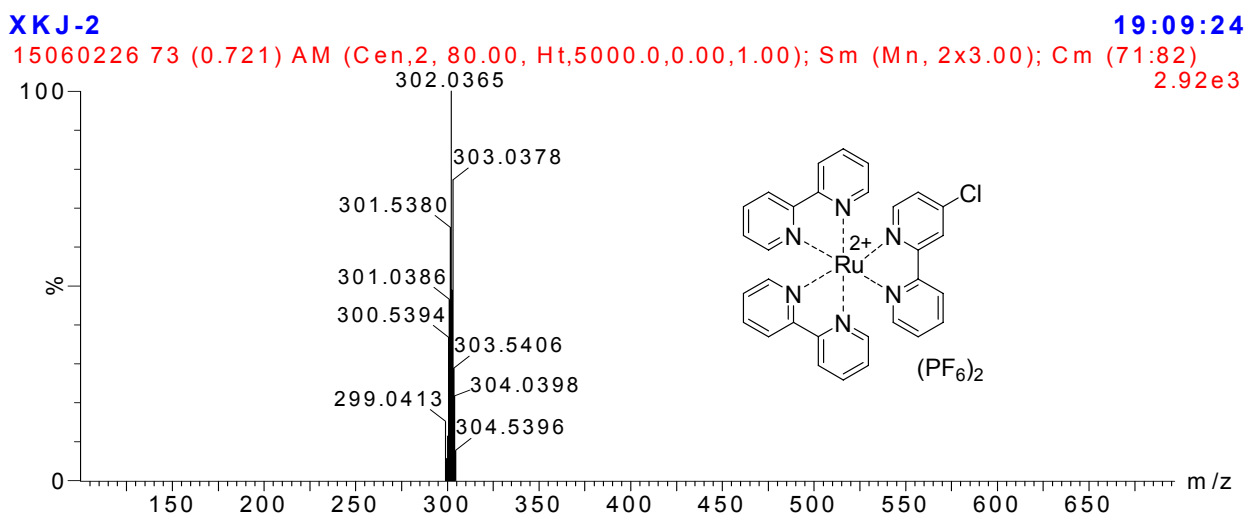

**Fig. S6** MALDI-HRMS of compound **4**.

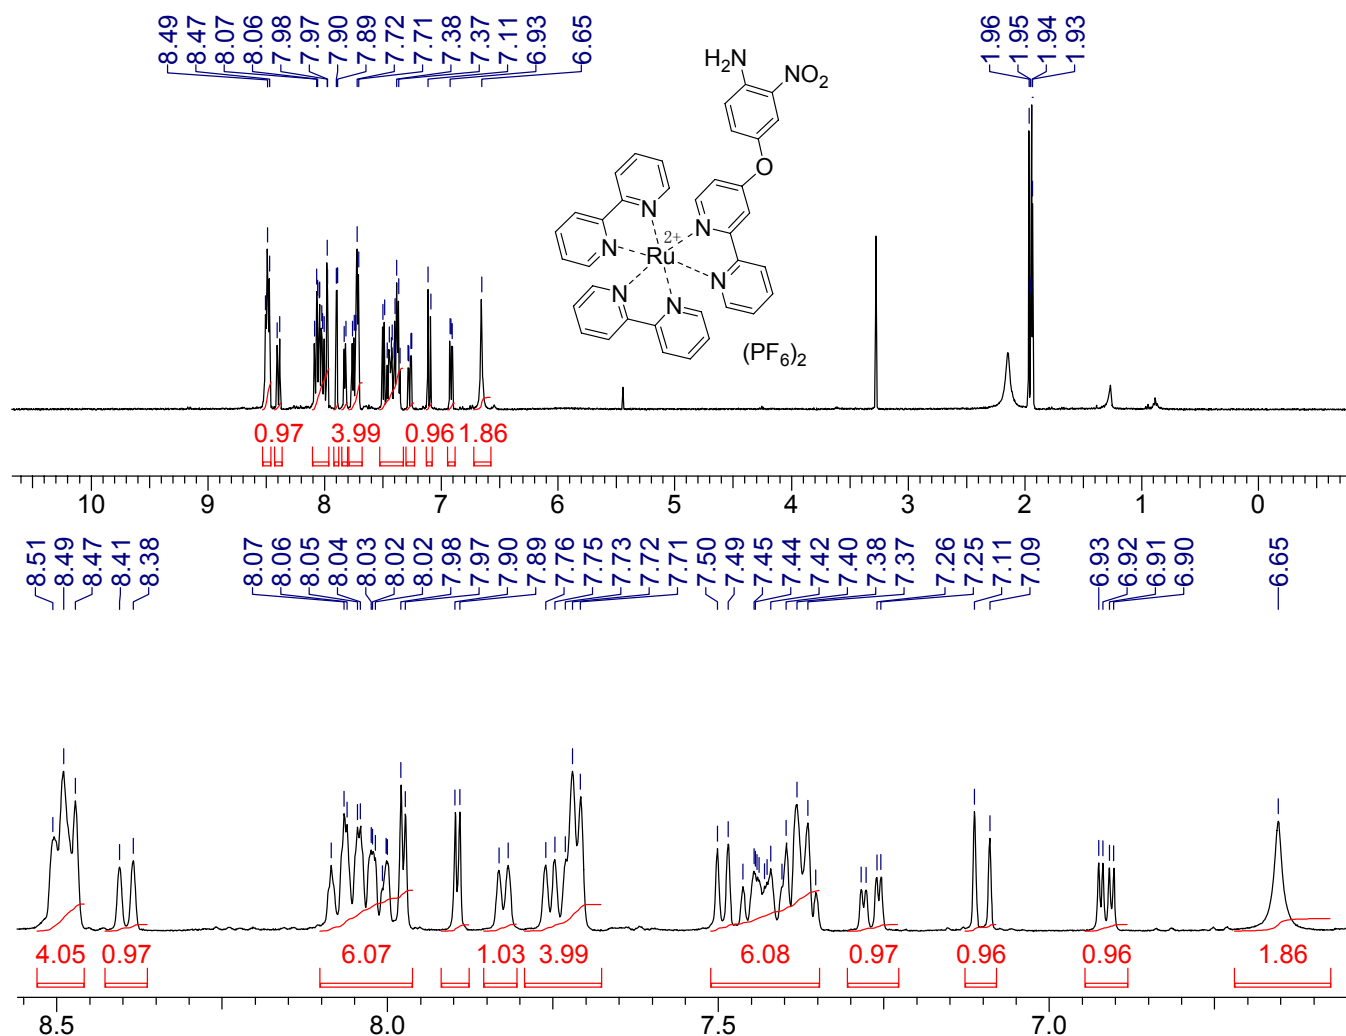

**Fig. S7**  $^1\text{H}$  NMR of compound **5** (400 MHz,  $\text{CD}_3\text{CN}$ ).

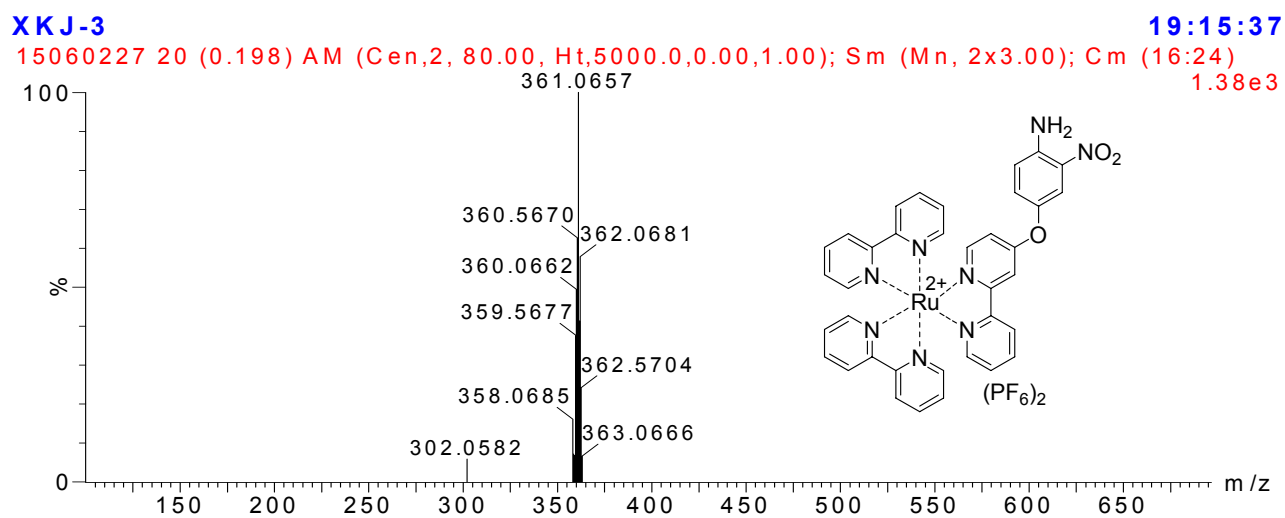

**Fig. S8** MALDI-HRMS of compound **5**.



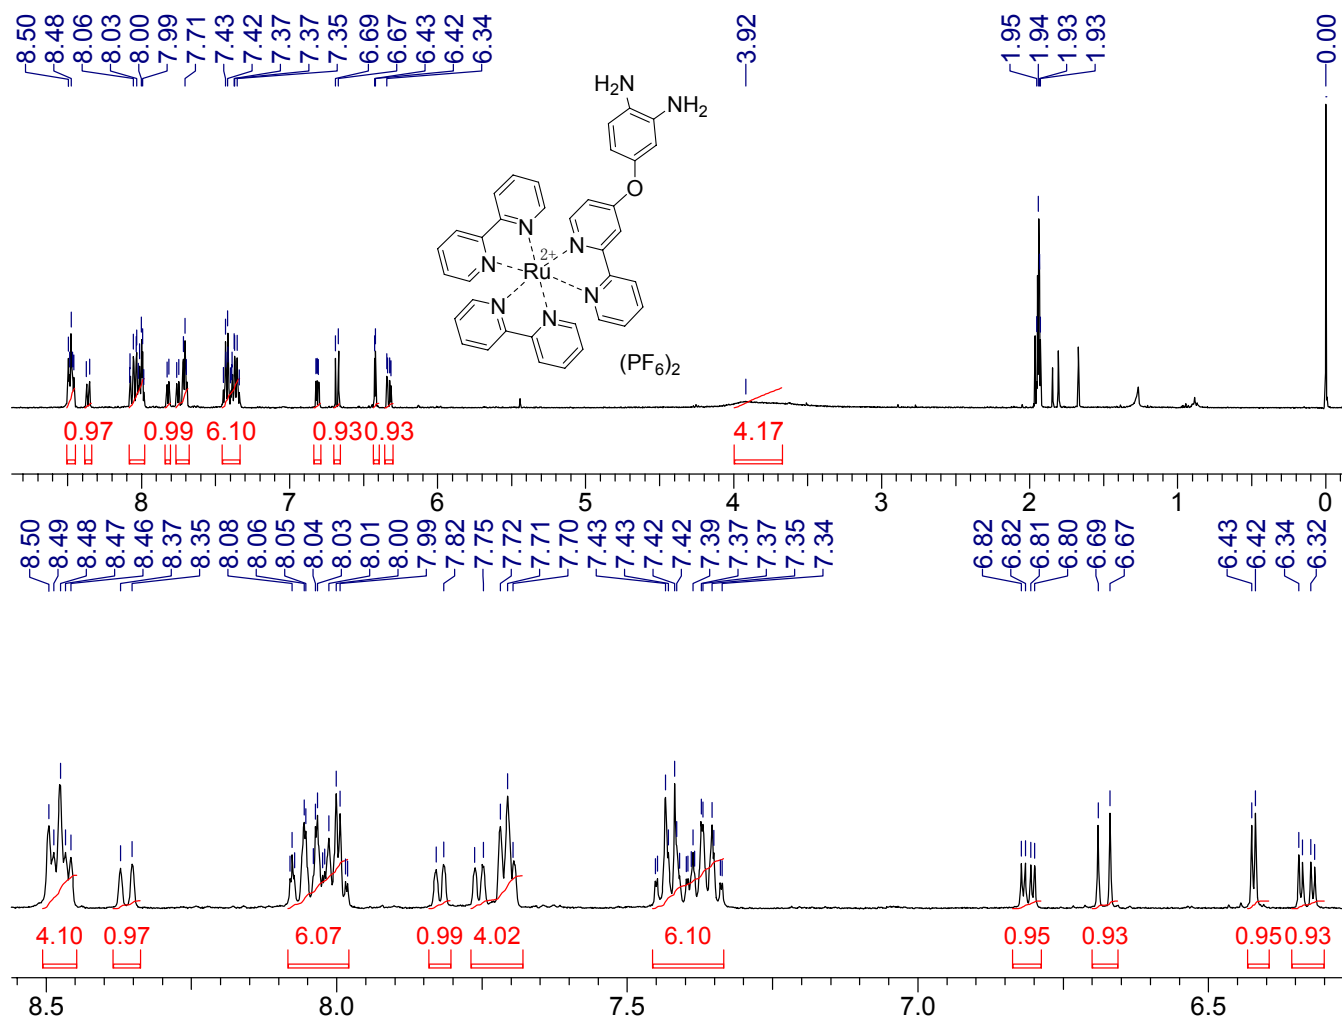

**Fig. S9**  $^1\text{H}$  NMR of Ru-1 (400 MHz,  $\text{CD}_3\text{CN}$ ).

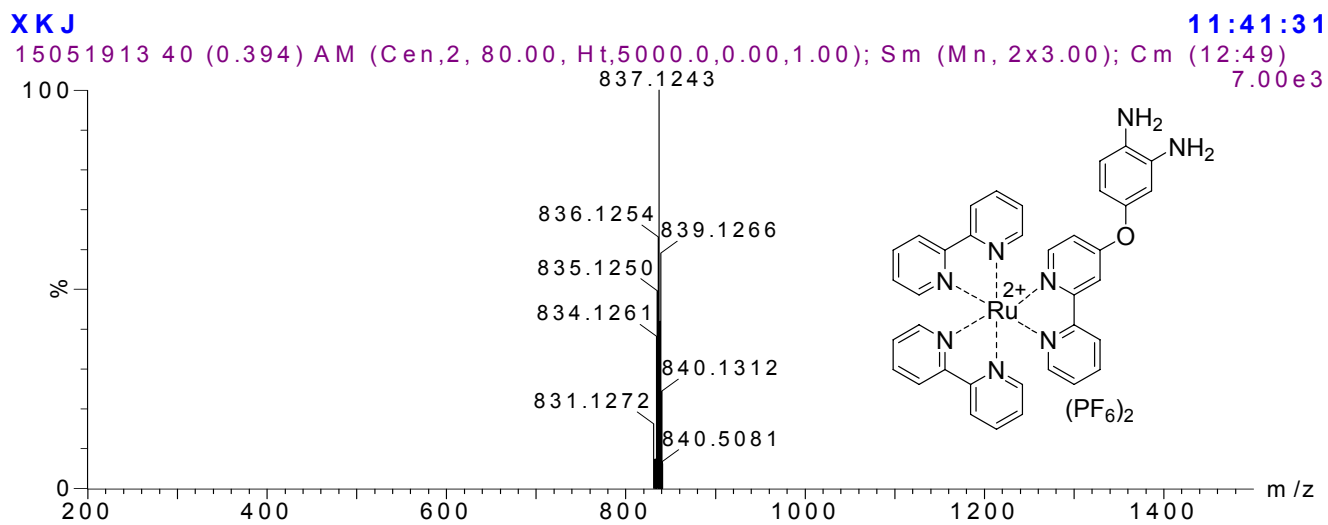

**Fig. S10** MALDI-HRMS of Ru-1.

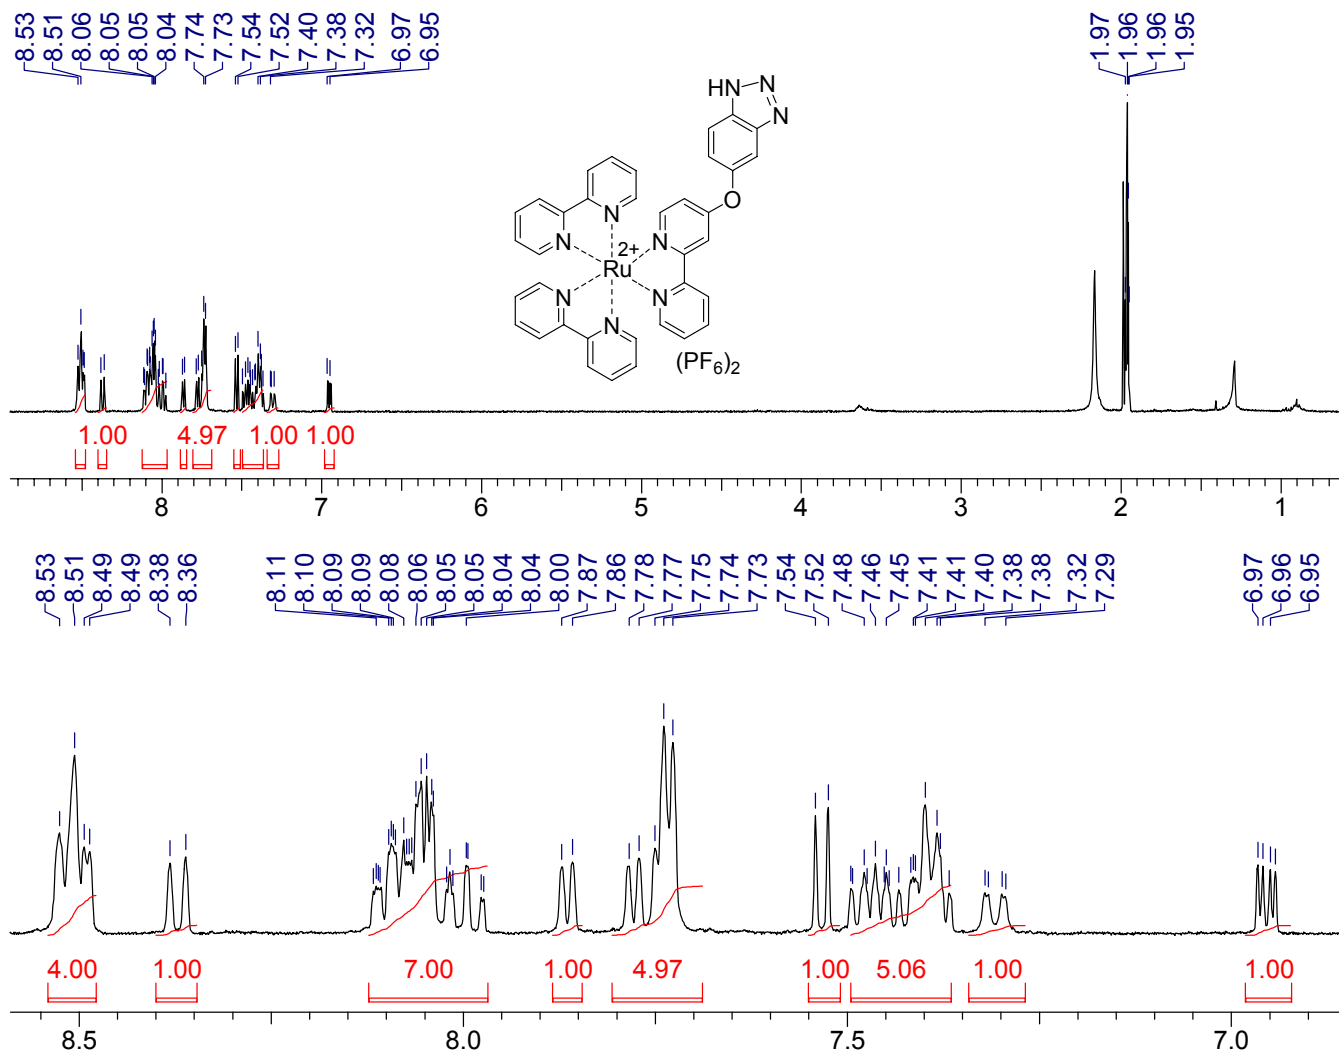

**Fig. S11**  $^1\text{H}$  NMR of **Ru-2** (400 MHz,  $\text{CD}_3\text{CN}$ ).

**XKJ-4**

15060228 31 (0.306) AM (Cen,2, 80.00, Ht,5000.0,0.00,1.00); Sm (Mn, 2x3.00); Cm (20:38)

**19:18:26**

3.22e3

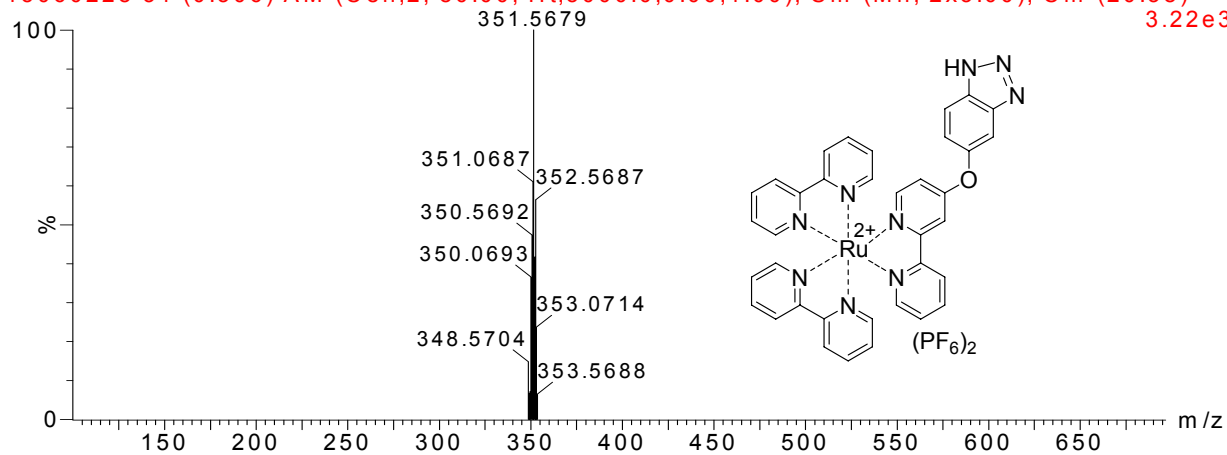

**Fig. S12** MALDI-HRMS of **Ru-2**.

### 3.0 Changes of phosphorescence spectra of Ru-1 upon the addition of NO

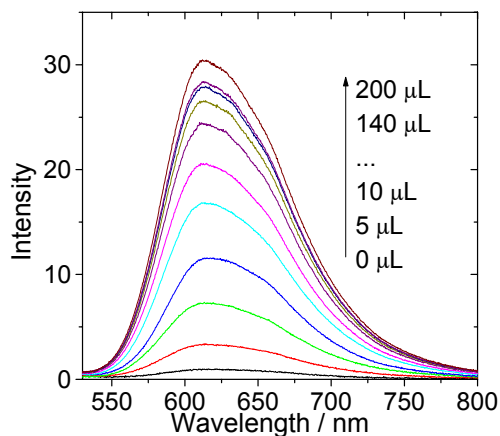

**Fig. S13** Changes of phosphorescence spectra of **Ru-1** upon the addition of NO (saturated solution in CH<sub>3</sub>CN).  $c = 1.0 \times 10^{-5}$  M,  $\lambda_{\text{ex}} = 445$  nm, In deaerated CH<sub>3</sub>CN, 20 °C.

### 4.0 Phosphorescence emission spectra of Ru-1 and Ru-2 in different deaerated solvents

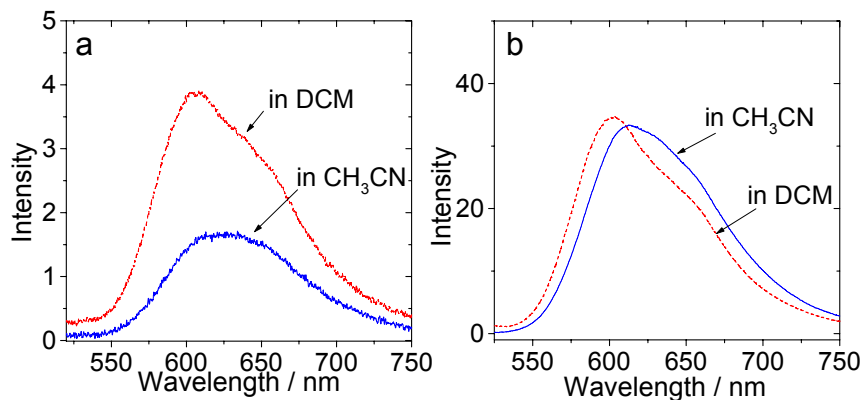

**Fig. S14** Phosphorescence emission spectra of **Ru-1** (a) and **Ru-2** (b) in different deaerated solvents.  $\lambda_{\text{ex}} = 445$  nm, 20 °C, optically matched solution was used ( $A = 0.14$ ).

## 5.0 Emission spectra and the decay trace of Ru-1 and Ru-2 at 77 K

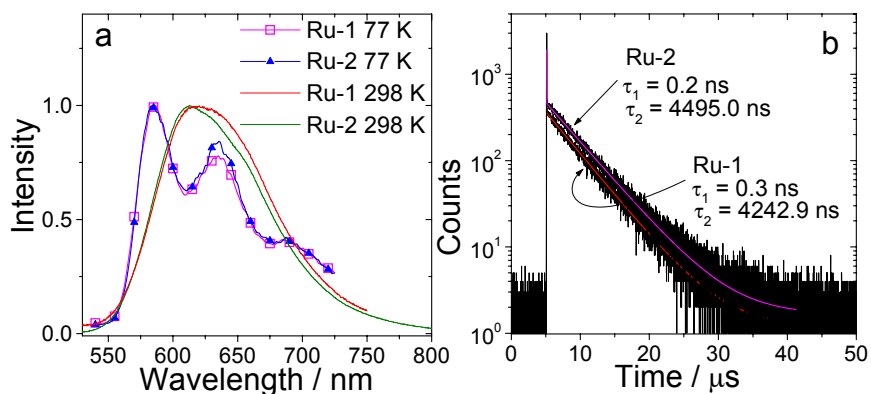

**Fig. S15** (a) Normalized emission spectra of **Ru-1** and **Ru-2** at 77 K (in deaerated EtOH–MeOH, 4: 1, v/ v) and 298 K (in deaerated CH<sub>3</sub>CN); (b) The lifetime of **Ru-1** and **Ru-2** at 77 K in deaerated EtOH– MeOH (4: 1, v/ v).  $c = 1.0 \times 10^{-5}$  M,  $\lambda_{\text{ex}} = 405$  nm,  $\lambda_{\text{em}} = 585$  nm.

## 6.0 Transient absorption spectra of Ru-1 with a high concentration

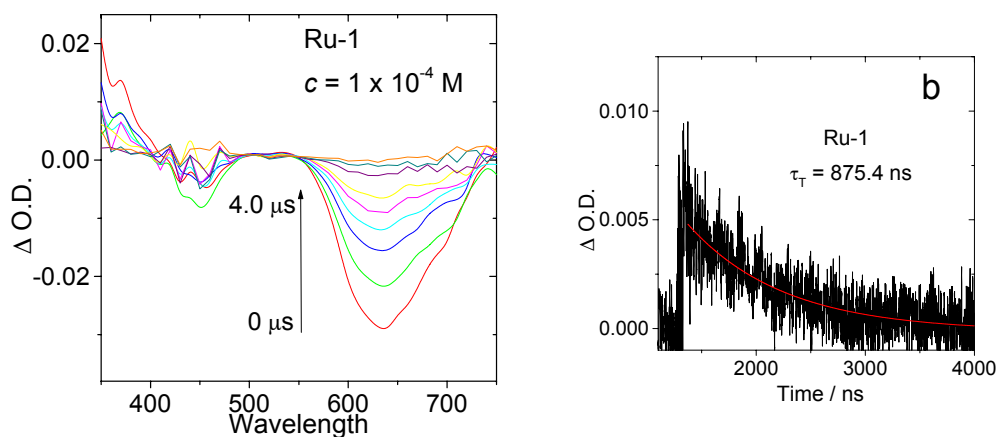

**Fig. S16** Transient absorption spectra of **Ru-1**.  $c$  [**Ru-1**] =  $1.0 \times 10^{-4}$  M. In deaerated CH<sub>3</sub>CN.

$\lambda_{\text{ex}} = 445$  nm, 20 °C.

## 7.0 Nanosecond transient absorption spectra of Ru-1, Ru-2 and Ru(bpy)<sub>3</sub>

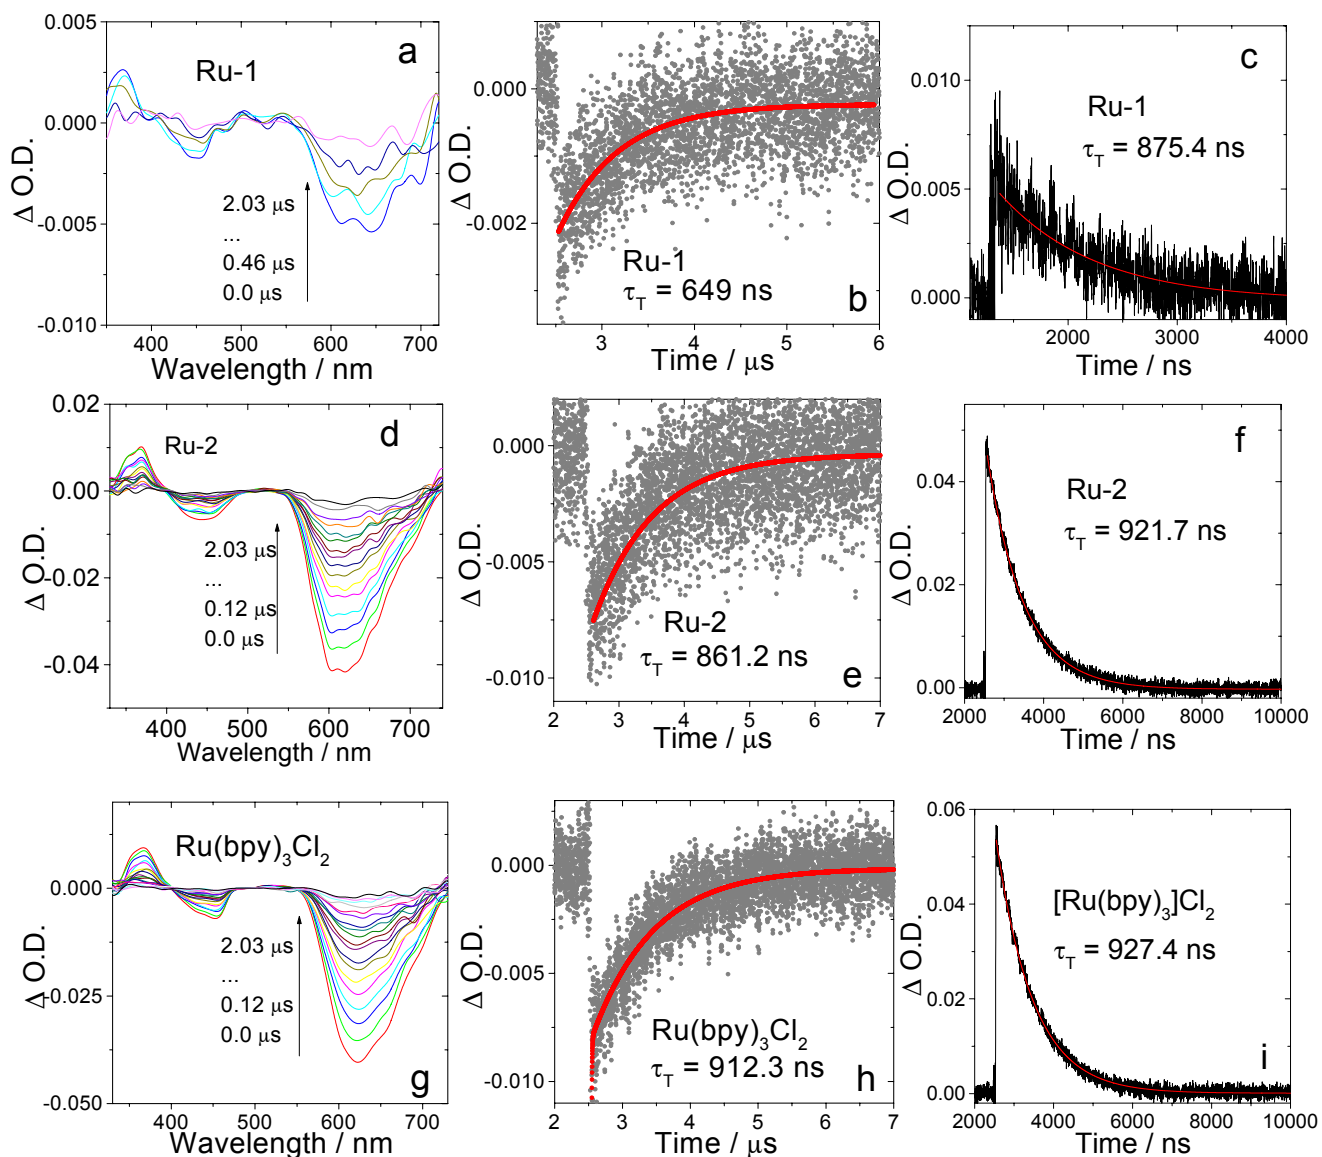

**Fig. S17** Transient absorption spectra of the complexes. (a) **Ru-1** and (b) Decay curves of **Ru-1** at 450 nm; (c) Decay curves of **Ru-1** at 610 nm; (d) **Ru-2** and (e) Decay curves of **Ru-2** at 450 nm; (f) Decay curves of **Ru-2** at 610 nm; (g) **Ru(bpy)<sub>3</sub>Cl<sub>2</sub>**; (h) Decay curves of **Ru(bpy)<sub>3</sub>Cl<sub>2</sub>** at 450 nm; (i) Decay curves of **Ru(bpy)<sub>3</sub>Cl<sub>2</sub>** at 610 nm.  $c$  [Complexes] =  $1.0 \times 10^{-5}$  M. In deaerated CH<sub>3</sub>CN.  $\lambda_{\text{ex}} = 445$  nm, 20 °C.

## 8.0 Femtosecond Transient absorption spectra of Ru-2 and Ru(bpy)<sub>3</sub>

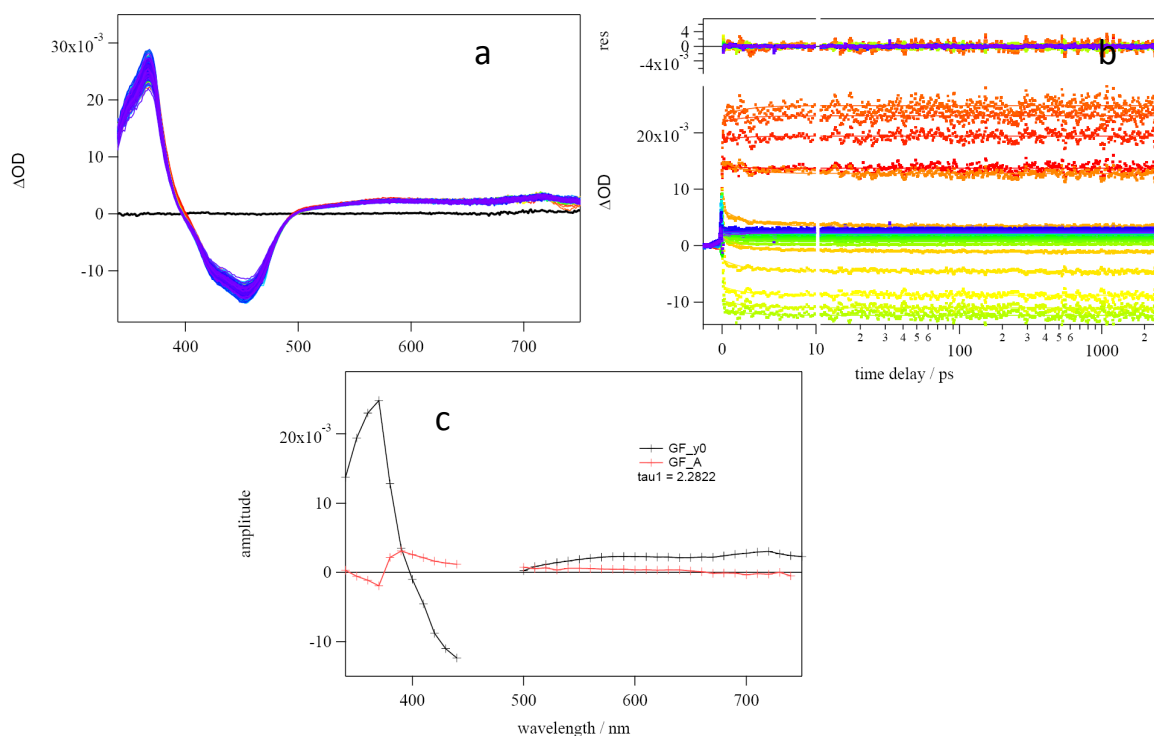

**Fig. S18** (a) Observed fs-TA spectra from 340 to 750 nm at various time delays from  $\tau = 0.2$  (red) to  $\tau = 2700$  ps (blue), and pre time zero  $\tau = -0.2$  ps (black) for a *ca.* 120 M solution of (**Ru-2**) in CH<sub>3</sub>CN solution using  $\lambda_{\text{ex}} = 470$  nm. (b) Corresponding kinetic plots and global fit of observed fs-TA signals from  $\tau = 0.2$  to  $\tau = 2700$  ps in 10 nm wavelength increments from 340 nm (red) to 750 nm (blue). NB: data between 450-490 nm was excluded due to the presence of scattered laser excitation, and note the change to log scale from  $\tau > 10$  ps on the *x*-axis. (c) Deconvolution of globally fitted kinetic data into Decay Associated Difference Spectra (DADS).

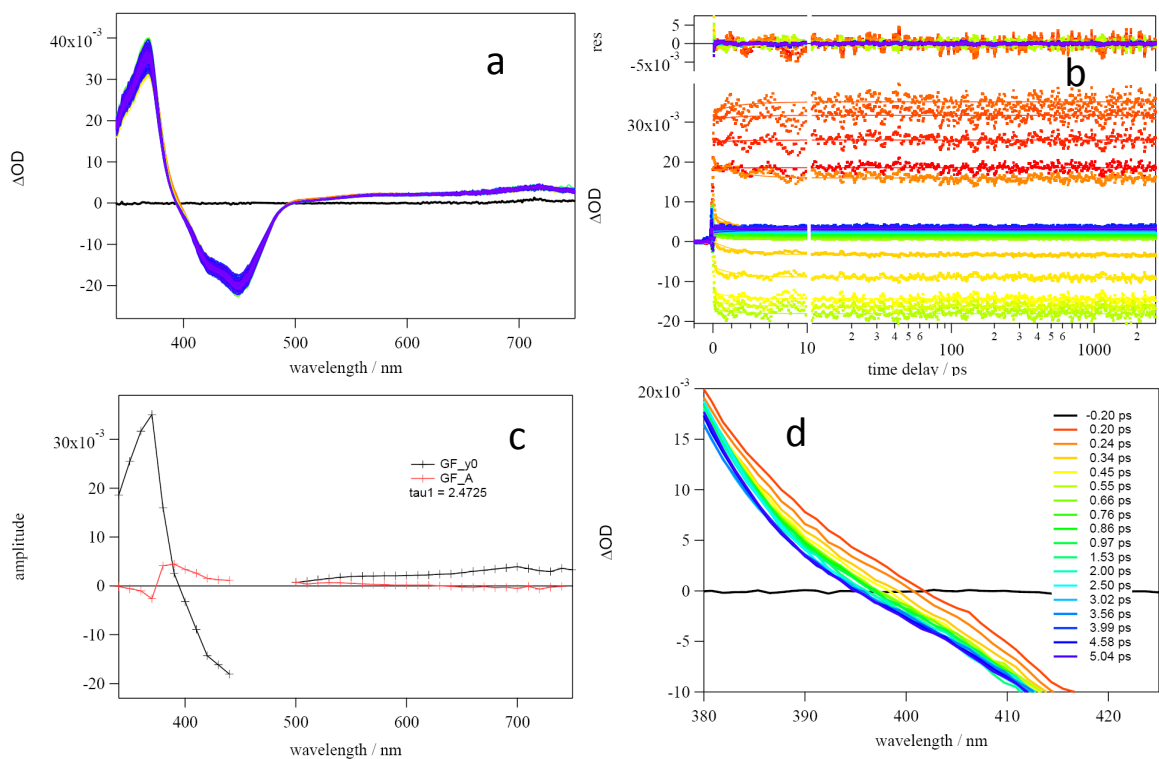

**Fig. S19** (a) Observed fs-TA spectra from 340 to 750 nm at various time delays from  $\tau = 0.2$  (red) to  $\tau = 2700$  ps (blue), and pre time zero  $\tau = -0.2$  ps (black) for a *ca.* 160 M solution of [Ru(bpy)<sub>3</sub>]<sup>2+</sup> in CH<sub>3</sub>CN solution using  $\lambda_{\text{ex}} = 470$  nm. (b) Corresponding kinetic plots and global fit of observed fs-TA signals from  $\tau = 0.2$  to  $\tau = 2700$  ps in 10 nm wavelength increments from 340 nm (red) to 750 nm (blue). NB: data between 450-490 nm was excluded due to the presence of scattered laser excitation, and note the change to log scale from  $\tau > 10$  ps on the x-axis. (c) Deconvolution of globally fitted kinetic data into Decay Associated Difference Spectra (DADS). (d) Expansion of fs-TA data showing blue shift of 370 nm ESA feature over first 5 ps due to vibrational cooling of rapidly formed <sup>3</sup>MLCT excited state (see text).

## 9.0 Changes of emission intensity of DPA upon the addition of NO

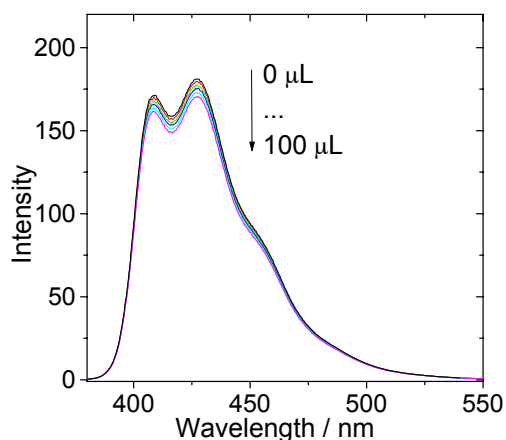

**Fig. S20** Changes of emission spectrum of DPA upon the addition of NO (saturated solution in CH<sub>3</sub>CN).  $c = 1.0 \times 10^{-5}$  M,  $\lambda_{\text{ex}} = 350$  nm, In CH<sub>3</sub>CN, 20 °C.

## 10.0 Changes of emission intensity of Ru-1 and Ru-2 upon the addition of NO

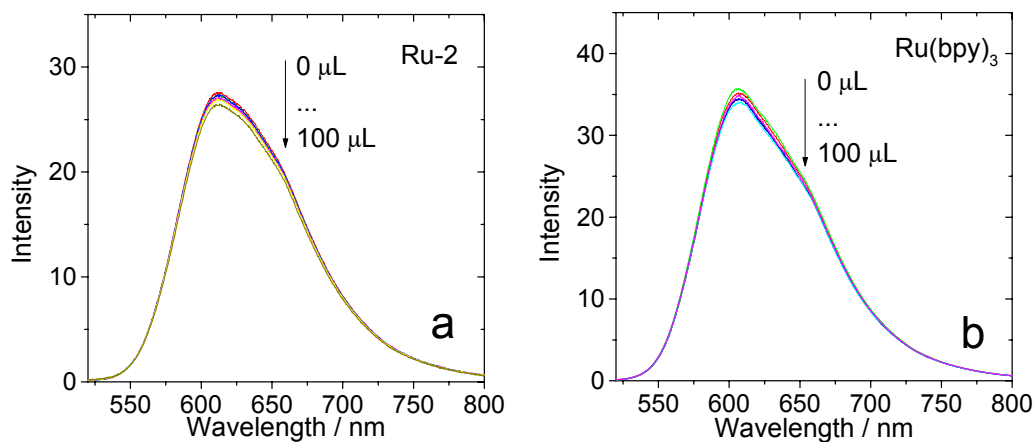

**Fig. S21** Changes of emission spectrum of **Ru-2** (a) and [Ru(bpy)<sub>3</sub>]<sub>2</sub>Cl<sub>2</sub> (b) upon the addition of NO (saturated solution in CH<sub>3</sub>CN).  $c = 1.0 \times 10^{-5}$  M,  $\lambda_{\text{ex}} = 445$  nm, In deaerated CH<sub>3</sub>CN, 20 °C.



## 11.0 HPLC analysis of the complexes Ru-1, Ru-2 and the reaction mixture of Ru-1 +

NO

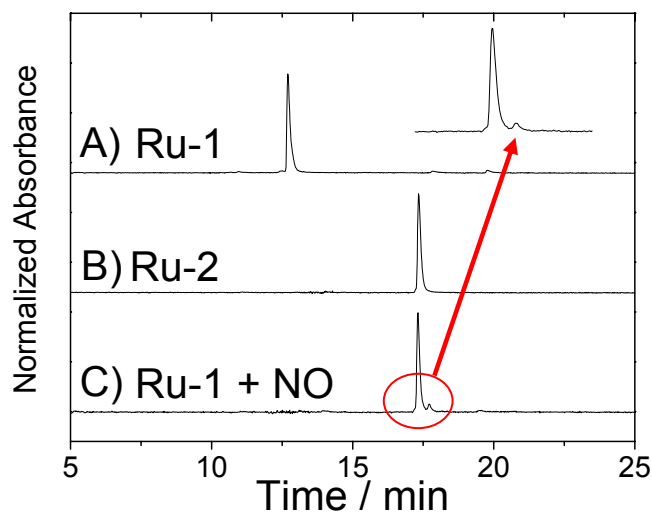

**Fig. S22** HPLC analysis of the complexes **Ru-1**, **Ru-2** and the reaction mixture of **Ru-1** + **NO**. Line A: pure **Ru-1** solution ( $1 \times 10^{-3}$  M); Line B: pure **Ru-2** solution ( $1 \times 10^{-3}$  M); Line C: the reaction mixture of **Ru-1** + **NO** (**NO** saturated solution) ( $1 \times 10^{-3}$  M).

## 12.0 The TTA upconversion of Ru-1 and Ru-2 upon the addition of NO

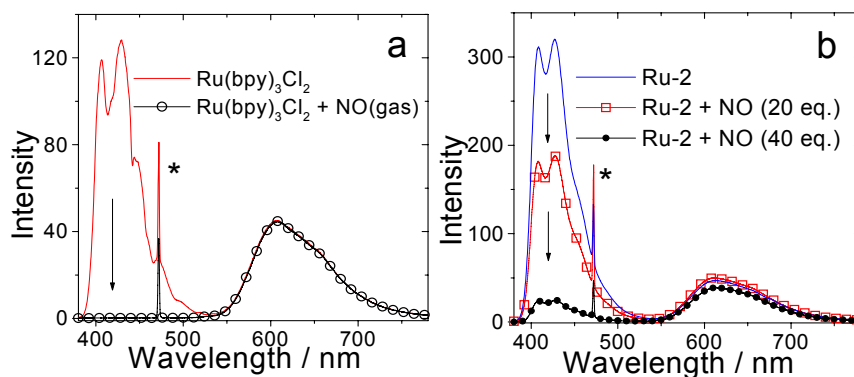

**Fig. S23** The upconversion intensity of **Ru(bpy)<sub>3</sub>Cl<sub>2</sub>** and **Ru-2** upon the addition of **NO** (saturated solution in CH<sub>3</sub>CN or pure **NO** gas). (a) Purging of the solution with pure **NO** gas for 10 second,  $c(\text{DPA}) = 2.0 \times 10^{-4}$  M; (b) **NO** saturated solution in CH<sub>3</sub>CN was added,  $c(\text{DPA}) = 4.0 \times 10^{-4}$  M.  $c(\text{Sensitizers}) = 2.0 \times 10^{-5}$  M.  $\lambda_{\text{ex}} = 473$  nm (4.8 mW). In deaerated CH<sub>3</sub>CN, 20 °C.

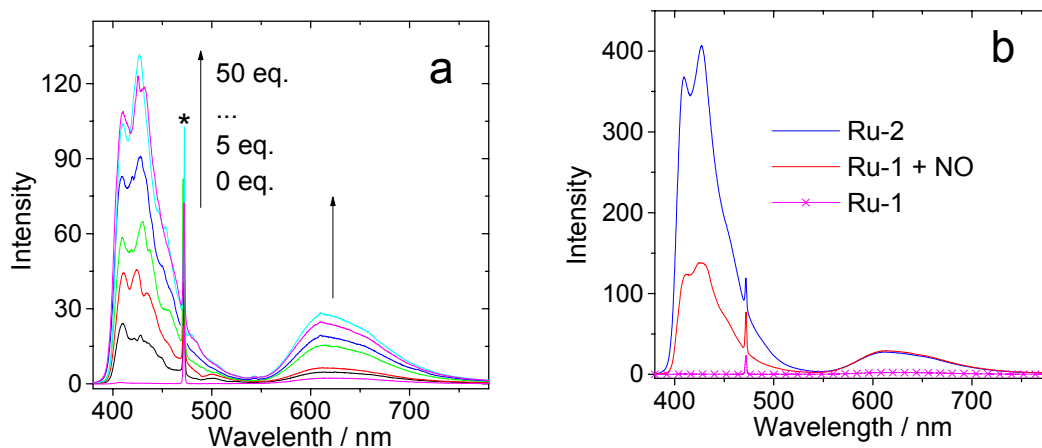

**Fig. S24** Upconverted fluorescence intensity upon the addition of NO ( $\text{NaNO}_2 + \text{HCl}$  solution). (a) **Ru-1** as photosensitizer, the detail procedure was that: different equivalent of  $\text{NaNO}_2 + \text{HCl}$  solution was added into **Ru-1** solution (in  $\text{CH}_3\text{CN}$ ) at  $0^\circ\text{C}$  for 10 min, then remove the solvent and dissolve the mixture in fresh  $\text{CH}_3\text{CN}$  for the TTA upconversion measurement; (b) the upconversion intensity of **Ru-2**, **Ru-1** and **Ru-1** in the presence of NO ( $\text{NaNO}_2 + \text{HCl}$  solution).  $\lambda_{\text{ex}} = 473 \text{ nm}$  (laser power: 4.8 mW).  $c(\text{sensitizers}) = 2.0 \times 10^{-5} \text{ M}$ ,  $c(\text{DPA}) = 4.0 \times 10^{-4} \text{ M}$ , in deaerated  $\text{CH}_3\text{CN}$ ,  $20^\circ\text{C}$ .

### 13.0 The changes of phosphorescence intensity of the photosensitizers upon the addition of DPA

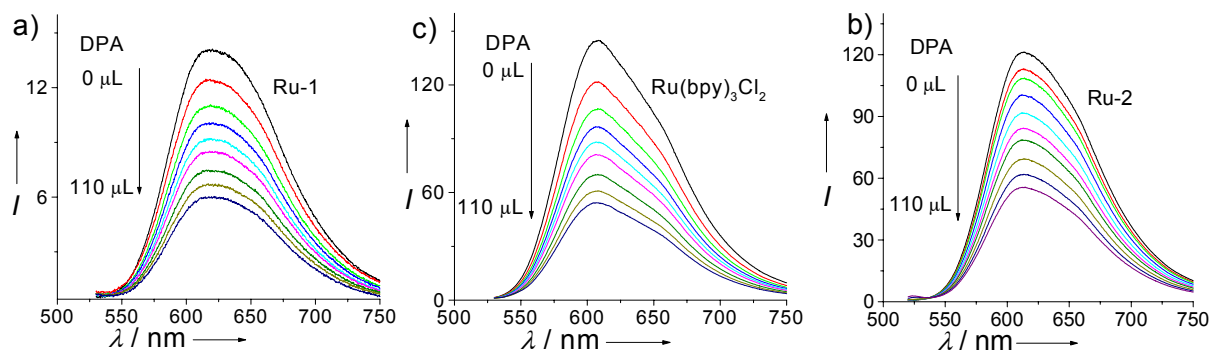

**Fig. S25.** (a), (b) and (c) the changes of phosphorescence intensity upon the addition of **DPA**,  $c(\text{DPA}) = 1.0 \times 10^{-2} \text{ M}$ ,  $c(\text{Photosensitizers}) = 1.0 \times 10^{-5} \text{ M}$ ,  $\lambda_{\text{ex}} = 445 \text{ nm}$  in  $\text{CH}_3\text{CN}$ ,  $20^\circ\text{C}$ .

The bimolecular quenching efficiency ( $f_Q$ ) was also studied. Stern-Volmer quenching constants were calculated as  $K_{SV} = 3.36 \times 10^3 \text{ M}^{-1}$  for **Ru-1**. The bimolecular quenching constant was calculated as  $k_q = K_{SV}/\tau_o = 4.95 \times 10^9 \text{ M}^{-1} \text{ s}^{-1}$ , where  $\tau_o$  is the triplet state lifetime of the triplet energy donor (737.6 ns). In order to study the quenching efficiency, which is given by  $f_Q = k_q/k_o$ , where  $k_o$  is the diffusion-controlled bimolecular quenching rating constants, we used the Smoluchowski equation,

$$k_o = 4\pi RND / 1000 = \frac{4\pi N}{1000} (R_f + R_q) (D_f + D_q) \quad (\text{Eq. 3})$$

where  $D$  is the sum of the diffusion coefficients of the energy donor ( $D_f$ ) and quencher ( $D_q$ ),  $N$  is Avogadro's number and  $R$  is the collision radius obtained as the sum of the molecule radii of the energy donor ( $R_f$ ) and the quencher ( $R_q$ ). Diffusion coefficients can be obtained from Stokes-Einstein equation:

$$D = kT/6\pi\eta R \quad (\text{Eq. 4})$$

where  $k$  is Boltzmann's constant,  $\eta$  is the solvent viscosity and  $R$  is the molecule radius.

#### 14.0 Decay curves of Ru-1 in aerated CH<sub>3</sub>CN

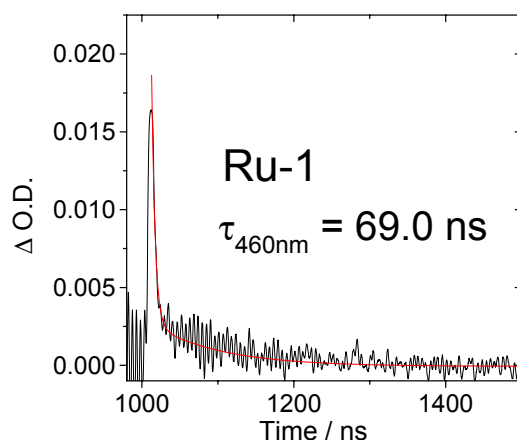

**Fig. S26** Decay curves of **Ru-1** at 460 nm after pulsed laser excitation in aerated CH<sub>3</sub>CN.  $c$  [**Ru-1**] =  $1.0 \times 10^{-5} \text{ M}$ ,  $\lambda_{\text{ex}} = 445 \text{ nm}$ .

## 15.0 Calculation of triplet state quantum yield

**Table S1. The Parameter Related to Calculate the Triplet State Quantum Yields.** <sup>[a]</sup>

|                                          | $\varepsilon$ <sup>b</sup> | $\Delta A$ <sup>c</sup> | $\Phi_T(\%)$ <sup>d</sup> |
|------------------------------------------|----------------------------|-------------------------|---------------------------|
| <b>Ru-1</b>                              | 1.36                       | - 0.0017                | 22.2 $\pm$ 5              |
| <b>Ru-2</b>                              | 1.36                       | - 0.0065                | 85.5 $\pm$ 5              |
| <b>Ru(bpy)<sub>3</sub>Cl<sub>2</sub></b> | 1.26                       | - 0.0071                | 100.0                     |

[a] In deaerated CH<sub>3</sub>CN, [b] Molar absorption coefficient.  $\varepsilon$ : 10<sup>4</sup> M<sup>-1</sup> cm<sup>-1</sup>. [c] The O.D. value of the triplet transient difference absorption spectrum at 450 nm. [d] The triplet state quantum yield.

## 16.0 Cyclic voltammogram of Ru-1, Ru-2 and Ru(bpy)<sub>3</sub>Cl<sub>2</sub> in deaerated CH<sub>3</sub>CN

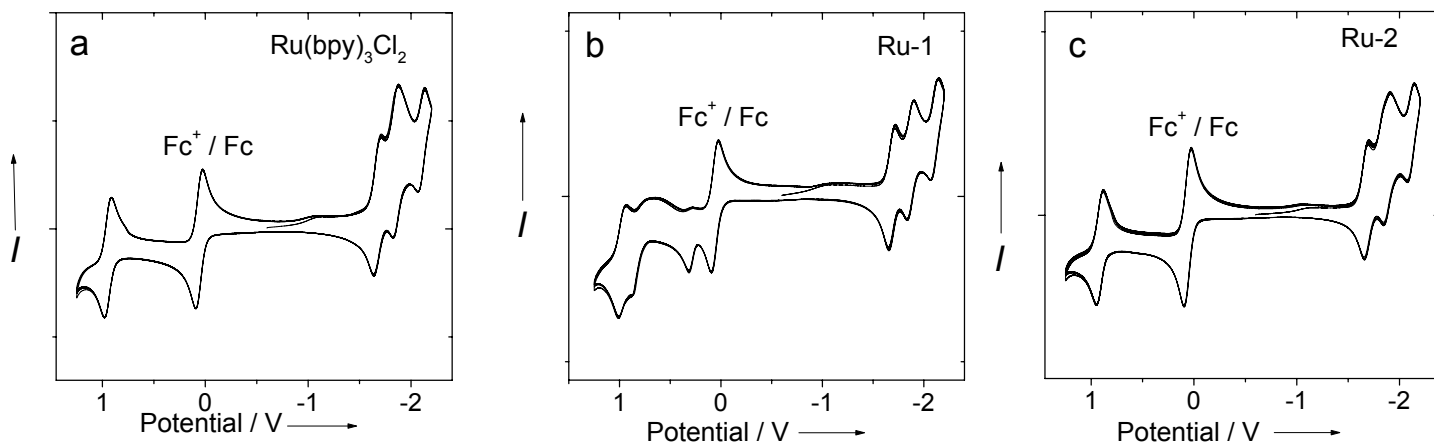

**Fig. S27.** Cyclic voltammogram of **Ru-1**, **Ru-2** and **Ru(bpy)<sub>3</sub>Cl<sub>2</sub>** in deaerated CH<sub>3</sub>CN containing 0.10 M Bu<sub>4</sub>NPF<sub>6</sub> as supporting electrode and with Ag/AgNO<sub>3</sub> reference electrode. Scan rates: 0.1 V/s, three cycles. Ferrocene (Fc) was used as internal reference, 20 °C.

Rehm-Weller equation (Eqs. 1 and 2.),<sup>63,64</sup>

$$\Delta G_{CS} = e[E_{OX} - E_{RED}] - E_{00} + \Delta G_S \quad (\text{Eq. 1}) \quad 20$$

$$\Delta G_S = -\frac{e^2}{4\pi\epsilon_S\epsilon_0 R_{CC}} - \frac{e^2}{8\pi\epsilon_0} \left( \frac{1}{R_D} + \frac{1}{R_A} \right) \left( \frac{1}{\epsilon_{REF}} - \frac{1}{\epsilon_S} \right) \quad (\text{Eq. 2})$$

where  $\Delta G_S$  is the static Coulombic energy, which is described by Eq. 2,  $e$  is the electronic charge,  $E_{OX}$  is the half-wave potential for mono-electron oxidation of the electron-donor unit and  $E_{RED}$  is the half-wave potential for one-electron reduction of the electron-acceptor unit.

## 17.0 Simplified Jablonski diagram illustrating the photophysical processes

**Scheme S2.** Simplified Jablonski Diagram Illustrating the Photophysical Processes Involved in the NO-switched TTA Upconversion, (a) **Ru-1** as Photosensitizer, (b) **Ru-2** as Photosensitizer.<sup>a</sup>

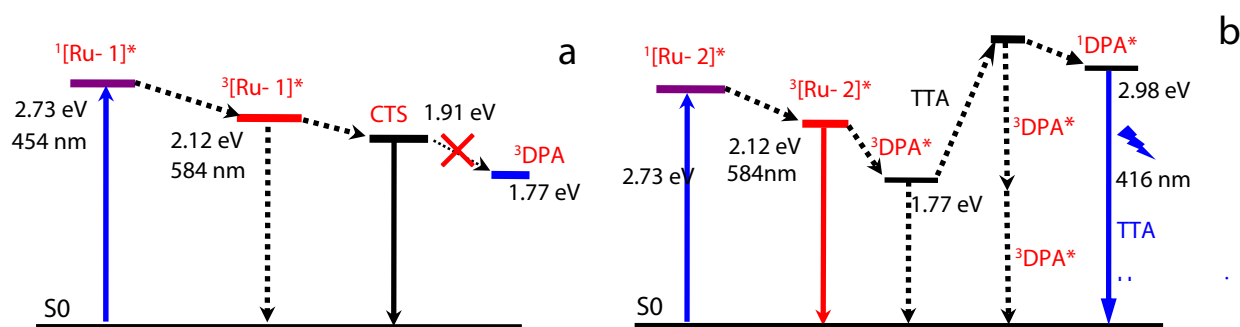

<sup>a</sup> The component at the excited state was designated with red color. The number of the superscript designated either the singlet or the triplet excited state. CH<sub>3</sub>CN as the solvent.
